# Supplementary material for: Postsynaptic cell type and synaptic distance do not determine efficiency of monosynaptic rabies virus spread measured at synaptic resolution
Source: eLife. 2023 Dec 14;12:e89297. doi: 10.7554/eLife.89297 (PMC10721217; doi:10.7554/eLife.89297)
Supplement: Source data 1. — Raw data includes counts for Nr5a1, Som, and vasoactive intestinal peptide (Vip) starter cells and control experiments omitting oG. [file elife-89297-data1.xlsx]

## Sheet: Nr5a1
Experiment Condition	Experiment Number	Cell Type	Neuron Number	Image Name	Dendrite Type	Distance from Soma	Length	PSD95	PSD95/uM	Synaptophysin	Syn/uM	% PSD with Syn
TVA_oG	RE.1	Nr5a1	Neuron 1	Neuron1_Apical_Proximal	Apical	Proximal	17.27	26	1.51	14	0.81	53.8462
TVA_oG	RE.1	Nr5a1	Neuron 1	Neuron1_Apical_Proximal	Apical	Proximal	76.06	151	1.99	86	1.13	56.9536
TVA_oG	RE.1	Nr5a1	Neuron 1	Neuron1_Apical_Distal	Apical	Distal	75.65	53	0.7	30	0.4	56.6038
TVA_oG	RE.1	Nr5a1	Neuron 1	Neuron1_Basal_Proximal	Basal	Proximal	81.14	90	1.11	35	0.43	38.8889
TVA_oG	RE.1	Nr5a1	Neuron 2	Neuron2_Apical_Proximal	Apical	Proximal	82.61	64	0.77	21	0.25	32.8125
TVA_oG	RE.1	Nr5a1	Neuron 2	Neuron2_Apical_Distal	Apical	Distal	85.13	91	1.07	30	0.35	32.967
TVA_oG	RE.1	Nr5a1	Neuron 3	Neuron3_Apical_Proximal	Apical	Proximal	82.72	98	1.18	53	0.64	54.0816
TVA_oG	RE.1	Nr5a1	Neuron 3	Neuron3_Apical_Distal	Apical	Distal	55.88	72	1.29	56	1	77.7778
TVA_oG	RE.1	Nr5a1	Neuron 3	Neuron3_Basal_Proximal	Basal	Proximal	48.86	47	0.96	25	0.51	53.1915
TVA_oG	RE.2	Nr5a1	Neuron 1	Neuron1_Apical_Proximal	Apical	Proximal	76.35	111	1.45	42	0.55	37.8378
TVA_oG	RE.2	Nr5a1	Neuron 1	Neuron1_Apical_Distal	Apical	Distal	92.3	109	1.18	50	0.54	45.8716
TVA_oG	RE.2	Nr5a1	Neuron 1	Neuron1_Basal_Distal	Basal	Distal	49.09	49	1	19	0.39	38.7755
TVA_oG	RE.2	Nr5a1	Neuron 1	Neuron1_Basal_Proximal	Basal	Proximal	76.25	62	0.81	14	0.18	22.5806
TVA_oG	RE.2	Nr5a1	Neuron 2	Neuron2_Apical_Distal	Apical	Distal	95.92	95	0.99	46	0.48	48.4211
TVA_oG	RE.2	Nr5a1	Neuron 2	Neuron2_Apical_Proximal	Apical	Proximal	78.19	68	0.87	37	0.47	54.4118
TVA_oG	RE.2	Nr5a1	Neuron 2	Neuron2_Basal_Proximal	Basal	Proximal	53.5	55	1.03	22	0.41	40
TVA_oG	RE.2	Nr5a1	Neuron 3	Neuron3_Apical_Proximal	Apical	Proximal	83.93	60	0.71	39	0.46	65
TVA_oG	RE.2	Nr5a1	Neuron 3	Neuron3_Apical_Distal	Apical	Distal	89.01	117	1.31	79	0.89	67.5214
TVA_oG	RE.2	Nr5a1	Neuron 3	Neuron3_Basal_Proximal	Basal	Proximal	47.37	32	0.68	18	0.38	56.25
TVA_oG	RE.3	Nr5a1	Neuron 1	Neuron1_Apical_Proximal	Apical	Proximal	68.57	68	0.99	26	0.38	38.2353
TVA_oG	RE.3	Nr5a1	Neuron 1	Neuron1_Apical_Distal	Apical	Distal	57.89	33	0.57	18	0.31	54.5455
TVA_oG	RE.3	Nr5a1	Neuron 2	Neuron2_Apical_Proximal	Apical	Proximal	68.13	34	0.5	18	0.26	52.9412
TVA_oG	RE.3	Nr5a1	Neuron 2	Neuron2_Apical_Distal	Apical	Distal	70.97	65	0.92	30	0.42	46.1538
TVA_oG	RE.3	Nr5a1	Neuron 2	Neuron2_Basal_Proximal	Basal	Proximal	82.19	66	0.8	34	0.41	51.5152
TVA_oG	RE.3	Nr5a1	Neuron 2	Neuron2_Basal_Distal	Basal	Distal	50.08	38	0.76	17	0.34	44.7368
TVA_oG	RE.3	Nr5a1	Neuron 3	Neuron3_Apical_Proximal	Apical	Proximal	77.79	99	1.27	51	0.66	51.5152
TVA_oG	RE.3	Nr5a1	Neuron 3	Neuron3_Apical_Distal	Apical	Distal	77.37	95	1.23	79	1.02	83.1579
TVA_alone	RE.4	Nr5a1	Neuron 1	RT.4_N1_Right_Basal	Basal	Proximal	69.379	31	0.446821	1	0.0144136	3.23
TVA_alone	RE.4	Nr5a1	Neuron 1	RT.4_N1_Soma_Apical	Apical	Proximal	46.138	29	0.628549	2	0.0433482	6.9
TVA_alone	RE.4	Nr5a1	Neuron 1	RT.4_N1_Soma_Deep	Basal	Proximal	43.955	14	0.318508	0	0	0
TVA_alone	RE.4	Nr5a1	Neuron 1	RT.4_N1_Soma_Deep	Basal	Proximal	64.324	42	0.652944	1	0.0155463	2.38
TVA_alone	RE.4	Nr5a1	Neuron 2	Neuron2_Apical_1	Apical	Proximal	69.569	88	1.26493	4	0.0574969	4.55
TVA_alone	RE.4	Nr5a1	Neuron 2	Neuron2_Apical_2	Apical	Proximal	82	226	2.7561	35	0.426829	15.49
TVA_alone	RE.4	Nr5a1	Neuron 2	Neuron2_Apical_3	Apical	Distal	97.82	120	1.22674	17	0.173789	14.17
TVA_alone	RE.4	Nr5a1	Neuron 2	Neuron2_Apical_3	Apical	Distal	47.08	53	1.12574	8	0.169924	15.09
TVA_alone	RE.4	Nr5a1	Neuron 2	Neuron2_Apical_3	Apical	Distal	18.86	44	2.33298	7	0.371156	15.91
TVA_alone	RE.4	Nr5a1	Neuron 2	Neuron2_LeftBasal_1	Basal	Proximal	59.12	61	1.0318	13	0.219892	21.31
TVA_alone	RE.4	Nr5a1	Neuron 2	Neuron2_LeftBasal_2	Basal	Distal	78.23	165	2.10917	10	0.127828	6.06
TVA_alone	RE.4	Nr5a1	Neuron 2	Neuron2_Soma_1	Apical	Proximal	19.11	36	1.88383	1	0.0523286	2.78
TVA_alone	RE.4	Nr5a1	Neuron 2	Neuron2_Soma_1	Apical	Proximal	11.63	25	2.14961	1	0.0859845	4
TVA_alone	RE.4	Nr5a1	Neuron 2	Neuron2_Soma_1	Apical	Proximal	13.75	67	4.87273	10	0.727273	14.93
TVA_alone	RE.4	Nr5a1	Neuron 2	Neuron2_Soma_1	Apical	Proximal	16.5	41	2.48485	2	0.121212	4.88
TVA_alone	RE.4	Nr5a1	Neuron 3	Neuron3_Apical_1	Apical	Proximal	87.86	152	1.73003	1	0.0113817	0.66
TVA_alone	RE.4	Nr5a1	Neuron 3	Neuron3_Apical_2	Apical	Distal	57.72	40	0.693001	10	0.17325	25
TVA_alone	RE.4	Nr5a1	Neuron 3	Neuron3_BottomBasal_1	Basal	Proximal	74.07	52	0.702039	9	0.121507	17.31
TVA_alone	RE.4	Nr5a1	Neuron 3	Neuron3_LeftBasal_1	Basal	Proximal	50.479	60	1.18861	5	0.0990511	8.33
TVA_alone	RE.4	Nr5a1	Neuron 3	Neuron3_LeftBasal_1	Basal	Proximal	29.835	40	1.34071	2	0.0670354	5
TVA_alone	RE.4	Nr5a1	Neuron 3	Neuron3_Soma_1	Apical	Proximal	41.81	31	0.741449	2	0.0478354	6.45
TVA_alone	RE.4	Nr5a1	Neuron 3	Neuron3_Soma_1	Basal	Proximal	37.21	36	0.967482	5	0.134372	13.89
TVA_alone	RE.4	Nr5a1	Neuron 3	Neuron3_Soma_1	Basal	Proximal	30.52	29	0.950197	4	0.131062	13.79
TVA_alone	RE.5	Nr5a1	Neuron 4	Neuron1_Apical_1	Apical	Proximal	74.79	231	3.08865	21	0.280786	9.09
TVA_alone	RE.5	Nr5a1	Neuron 4	Neuron1_Apical_1	Apical	Proximal	44.23	62	1.40176	7	0.158264	11.29
TVA_alone	RE.5	Nr5a1	Neuron 4	Neuron1_Apical_1	Apical	Proximal	37.58	45	1.19745	8	0.212879	17.78
TVA_alone	RE.5	Nr5a1	Neuron 4	Neuron1_Apical_2	Apical	Distal	48.12	103	2.14048	6	0.124688	5.83
TVA_alone	RE.5	Nr5a1	Neuron 4	Neuron1_BottonBasal_1	Basal	Proximal	41.76	61	1.46073	10	0.239464	16.39
TVA_alone	RE.5	Nr5a1	Neuron 4	Neuron1_BottonBasal_1	Basal	Proximal	33.45	80	2.39163	22	0.657698	27.5
TVA_alone	RE.5	Nr5a1	Neuron 4	Neuron1_BottonBasal_2	Basal	Distal	85.41	193	2.25969	2	0.0234165	1.04
TVA_alone	RE.5	Nr5a1	Neuron 5	Neuron2_Apical_1	Apical	Proximal	34.57	58	1.67776	4	0.115707	6.9
TVA_alone	RE.5	Nr5a1	Neuron 5	Neuron2_Apical_2	Apical	Distal	80.28	84	1.04634	4	0.0498256	4.76
TVA_alone	RE.5	Nr5a1	Neuron 5	Neuron2_LeftBasal_1	Basal	Proximal	85.15	66	0.775103	9	0.105696	13.64
TVA_alone	RE.5	Nr5a1	Neuron 5	Neuron2_Soma_1	Basal	Proximal	66.44	49	0.737508	0	0	0

## Sheet: Som Vip
Experiment Number	Cell Type	Neuron Number	Image Name	Dendrite Type	Distance from Soma	Length	PSD95	PSD95/uM	Synaptophysin	Syn/uM	% PSD with Syn
RE.38	Som	Neuron 4	Neuron4_Distal	Dendrite	Distal	93.297	45	0.482331	16	0.171495	35.56
RE.38	Som	Neuron 4	Neuron4_Proximal	Dendrite 1	Proximal	38.14	21	0.550603	8	0.209754	38.1
RE.38	Som	Neuron 4	Neuron4_Proximal	Dendrite 2	Proximal	26.48	48	1.81269	24	0.906344	50
RE.38	Som	Neuron 5	Neuron5_Distal	Dendrite	Distal	67.14	24	0.357462	5	0.0744713	20.83
RE.38	Som	Neuron 5	Neuron5_Proximal	Dendrite 1	Proximal	43.7	17	0.389016	3	0.0686499	17.65
RE.38	Som	Neuron 5	Neuron5_Proximal	Dendrite 2	Proximal	35.509	19	0.535076	9	0.253457	47.37
RE.38	Som	Neuron 6	Neuron6_Distal	Dendrite 1	Distal	86.123	47	0.545731	14	0.162558	29.79
RE.38	Som	Neuron 6	Neuron6_Distal	Dendrite 2	Distal	23.603	11	0.466042	5	0.211837	45.45
RE.38	Som	Neuron 6	Neuron6_Proximal	Dendrite 1	Proximal	30.63	25	0.816193	12	0.391773	48
RE.38	Som	Neuron 6	Neuron6_Proximal	Dendrite 2	Proximal	25.55	12	0.469667	5	0.195695	41.67
RE.39	Som	Neuron 1	Neuron1_Distal	Dendrite	Distal	85.733	44	0.513221	17	0.19829	38.64
RE.39	Som	Neuron 1	Neuron1_Proximal	Dendrite 1	Proximal	38.846	18	0.463368	8	0.205941	44.44
RE.39	Som	Neuron 2	Neuron2_Distal	Dendrite	Distal	91.819	72	0.784151	25	0.272275	34.72
RE.39	Som	Neuron 2	Neuron2_Proximal	Dendrite 1	Proximal	83.619	37	0.442483	4	0.047836	10.81
RE.39	Som	Neuron 2	Neuron2_Proximal	Dendrite 2	Proximal	81.447	57	0.699842	23	0.282392	40.35
RE.39	Som	Neuron 2	Neuron2_Proximal	Dendrite 3	Proximal	39.45	30	0.760456	12	0.304183	40
RE.39	Som	Neuron 3	Neuron3_Distal	Dendrite	Distal	82.504	67	0.812082	27	0.327257	40.3
RE.39	Som	Neuron 3	Neuron3_Proximal	Dendrite 1	Proximal	34.548	26	0.752576	10	0.289452	38.46
RE.39	Som	Neuron 3	Neuron3_Proximal	Dendrite 2	Proximal	49.377	68	1.37716	23	0.465804	33.82
RE.39	Som	Neuron 3	Neuron3_Proximal	Dendrite 3	Proximal	20.201	8	0.39602	3	0.148507	37.5
RE.40	Som	Neuron 1	Neuron1_Distal	Dendrite 1	Distal	72.058	69	0.957562	25	0.346943	36.23
RE.40	Som	Neuron 1	Neuron1_Proximal	Dendrite 1	Proximal	39.16	29	0.740552	11	0.280899	37.93
RE.40	Som	Neuron 1	Neuron1_Proximal	Dendrite 2	Proximal	43.76	37	0.845521	13	0.297075	35.14
RE.40	Som	Neuron 2	Neuron2_Distal	Dendrite 1	Distal	92.636	96	1.03631	21	0.226694	21.88
RE.40	Som	Neuron 2	Neuron2_Proximal	Dendrite 1	Proximal	49.811	34	0.68258	6	0.120455	17.65
RE.40	Som	Neuron 2	Neuron2_Proximal	Dendrite 2	Proximal	34.544	38	1.10005	12	0.347383	31.58
RE.40	Som	Neuron 2	Neuron2_Proximal	Dendrite 3	Proximal	39.814	27	0.678153	11	0.276285	40.74
RE.40	Som	Neuron 2	Neuron2_Proximal	Dendrite 4	Proximal	29.749	27	0.907594	9	0.302531	33.33
RE.40	Som	Neuron 3	Neuron3_Distal	Dendrite 1	Distal	71.96	54	0.750417	21	0.291829	38.89
RE.40	Som	Neuron 3	Neuron3_Proximal	Dendrite 1	Proximal	61.622	51	0.827626	19	0.308331	37.25
RE.41	Vip	Neuron 1	Neuron1_Distal	Dendrite	Distal	89.416	49	0.552474	17	0.190123	34.41
RE.41	Vip	Neuron 1	Neuron1_Proximal	Dendrite	Proximal	46.093	23	0.507669	7	0.151867	29.91
RE.41	Vip	Neuron 2	Neuron2_Distal	Dendrite	Distal	64.467	44	0.685622	16	0.248189	36.2
RE.41	Vip	Neuron 2	Neuron2_Proximal	Dendrite 1	Proximal	34.833	25	0.709098	11	0.315792	44.53
RE.41	Vip	Neuron 2	Neuron2_Proximal	Dendrite 2	Proximal	26.285	8	0.321476	4	0.152178	47.34
RE.41	Vip	Neuron 2	Neuron2_Proximal	Dendrite 3	Proximal	37.178	21	0.576954	9	0.242079	41.96
RE.41	Vip	Neuron 3	Neuron3_Distal	Dendrite	Distal	66.027	46	0.698956	15	0.22718	32.5
RE.41	Vip	Neuron 3	Neuron3_Proximal	Dendrite 1	Proximal	73.325	41	0.558473	14	0.190931	34.19
RE.41	Vip	Neuron 3	Neuron3_Proximal	Dendrite 2	Proximal	10.441	5	0.498037	3	0.287329	57.69
RE.42	Vip	Neuron 1	Neuron1_Distal	Dendrite 1	Distal	76.555	55	0.713213	21	0.274313	38.46
RE.42	Vip	Neuron 1	Neuron1_Distal	Dendrite 2	Distal	39.366	38	0.974191	9	0.228624	23.47
RE.42	Vip	Neuron 1	Neuron1_Proximal	Dendrite	Proximal	50.961	33	0.650497	15	0.294343	45.25
RE.42	Vip	Neuron 2	Neuron2_Distal	Dendrite	Distal	94.48	79	0.832451	30	0.317528	38.14
RE.42	Vip	Neuron 2	Neuron2_Proximal	Dendrite 1	Proximal	36.486	35	0.962013	16	0.438524	45.58
RE.42	Vip	Neuron 2	Neuron2_Proximal	Dendrite 2	Proximal	45.017	26	0.57756	10	0.222138	38.46
RE.42	Vip	Neuron 3	Neuron3_Distal	Dendrite	Distal	92.147	44	0.472614	16	0.173636	36.74
RE.42	Vip	Neuron 3	Neuron3_Proximal	Dendrite 1	Proximal	44.438	22	0.497322	9	0.202529	40.72
RE.42	Vip	Neuron 3	Neuron3_Proximal	Dendrite 2	Proximal	47.575	23	0.478192	10	0.210194	43.96
RE.43	Vip	Neuron 1	Neuron1_Distal	Dendrite 1	Distal	76.218	42	0.554331	11	0.144323	26.04
RE.43	Vip	Neuron 1	Neuron1_Distal	Dendrite 2	Distal	23.279	12	0.530521	7	0.3007	56.68
RE.43	Vip	Neuron 1	Neuron1_Proximal	Dendrite 1	Proximal	38.762	32	0.821681	11	0.283783	34.54
RE.43	Vip	Neuron 1	Neuron1_Proximal	Dendrite 2	Proximal	30.577	21	0.68025	8	0.261635	38.46
RE.43	Vip	Neuron 2	Neuron2_Distal	Dendrite	Distal	90.176	58	0.641523	20	0.221789	34.57
RE.43	Vip	Neuron 2	Neuron2_Proximal	Dendrite	Proximal	76.796	49	0.634799	16	0.208344	32.82
RE.43	Vip	Neuron 3	Neuron3_Distal	Dendrite 1	Distal	42.63	31	0.731879	12	0.281492	38.46
RE.43	Vip	Neuron 3	Neuron3_Distal	Dendrite 2	Distal	34.625	21	0.619495	9	0.259928	41.96
RE.43	Vip	Neuron 3	Neuron3_Proximal	Dendrite	Proximal	83.266	62	0.741599	24	0.288233	38.87
